# Supplementary material for: Human Cord Blood and Bone Marrow CD34+ Cells Generate Macrophages That Support Erythroid Islands
Source: PLOS journal article supplement (doi:10.1371/journal.pone.0171096), 2017-01-30

Supplementary Figure 4

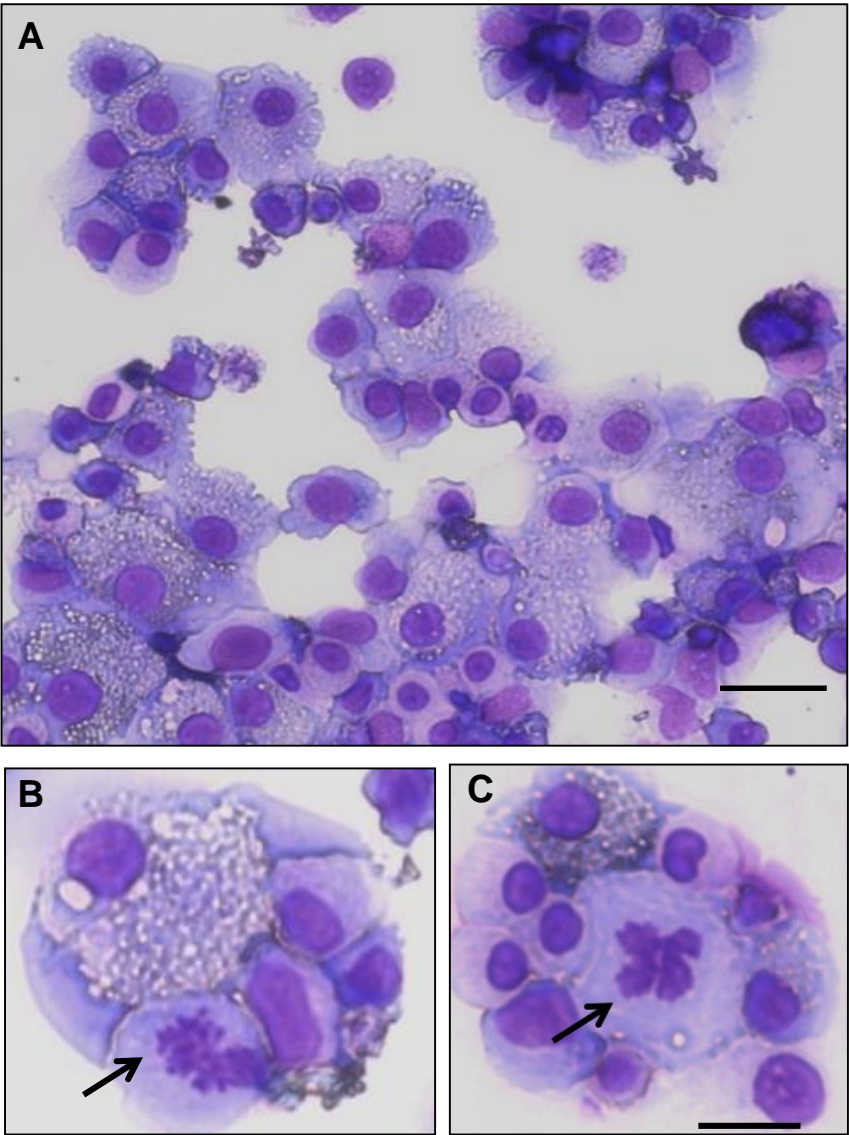

Supplement: S4 (10.1371/journal.pone.0171096.s004) [file journal.pone.0171096.s004]
