# Supplementary material for: Human Cord Blood and Bone Marrow CD34+ Cells Generate Macrophages That Support Erythroid Islands
Source: PLOS journal article supplement (doi:10.1371/journal.pone.0171096), 2017-01-30
Supplement: S8 (10.1371/journal.pone.0171096.s008) [file journal.pone.0171096.s008]

## S1 File. Material and Methods

**RT-qPCR.** RNA was extracted from CD14+ BM derived monocytes and erythroid island associated CD206+ macrophages (sorted at day 14 CGS expansion culture) by Direct-Zol kit (Zymo Research). cDNA was synthesized using Maxima H minus first strand cDNA synthesis kit (ThermoFisher), and quantified by PowerUp SYBR Green Master Mix (ThermoFisher). Cycling conditions were 50°C for 2 min, 95°C for 5 min, and 49 cycles of 95°C for 15 sec, 60°C for 30 sec. Data are represented as Log2 delta delta Ct values after normalization to *GAPDH* mRNA levels. Primers used in this experiment are listed below.

|         |                              |
|---------|------------------------------|
| GAPDH   | F: AAGGCTGGGGCTCATTTGC       |
|         | R: GAGGCATTGCTGATGATCTTG     |
| CD163   | F: AGCGGCTTGCAGTTTCCTC       |
|         | R: GGAATTTTCTGAGGAATTCATTAGG |
| ICAM4   | F: GATCACCGCCTACAAACCG       |
|         | R: GGGAACACCTGCGTCACG        |
| DNASE2  | F: CAGCCAGCTCGCCTTCC         |
|         | R: CCCCCATCGTGGTCAAGG        |
| ITGAM   | F: ACAGCCTTGTTTCCCTTTGAG     |
|         | R: ATTTCTCACAGTCACTGTCACG    |
| SLC40A1 | F: GACTTAAAGTGGCCCAGACC      |
|         | R: GCAGGAAGTGAGAACCCATC      |
